# Supplementary material for: Pirfenidone Inhibits Alveolar Bone Loss in Ligature-Induced Periodontitis by Suppressing the NF-κB Signaling Pathway in Mice
Source: MDPI journal article supplement (doi:10.3390/ijms24108682), 2023-05-12
Supplement: s1 [file s1]

## Supplementary Materials

# Pirfenidone Inhibits Alveolar Bone Loss in Ligature-Induced Periodontitis by Suppressing the NF- $\kappa$ B Signaling Pathway in Mice

Zijiao Zhang <sup>1,2</sup>, Juhan Song <sup>1,2</sup>, Seung-Hee Kwon <sup>1,2</sup>, Zhao Wang <sup>1,2</sup>, Suk-Gyun Park <sup>1,2</sup>, Xianyu Piao <sup>1,2</sup>, Je-Hwang Ryu <sup>1,2</sup>, Nacksung Kim <sup>2,3</sup>, Ok-Su Kim <sup>2,4</sup>, Sun-Hun Kim <sup>2,5</sup> and Jeong-Tae Koh <sup>1,2,\*</sup>

<sup>1</sup> Department of Pharmacology and Dental Therapeutics, School of Dentistry, Chonnam National University, Gwangju 61186, Republic of Korea

<sup>2</sup> Hard-Tissue Biointerface Research Center, School of Dentistry, Chonnam National University, Gwangju 61186, Republic of Korea

<sup>3</sup> Department of Pharmacology, Chonnam National University Medical School, Gwangju 61469, Republic of Korea

<sup>4</sup> Department of Periodontology, School of Dentistry, Chonnam National University, Gwangju 61186, Republic of Korea

<sup>5</sup> Department of Oral Anatomy, School of Dentistry, Chonnam National University, Gwangju 61186, Republic of Korea

\* Correspondence: jtkoh@chonnam.ac.kr

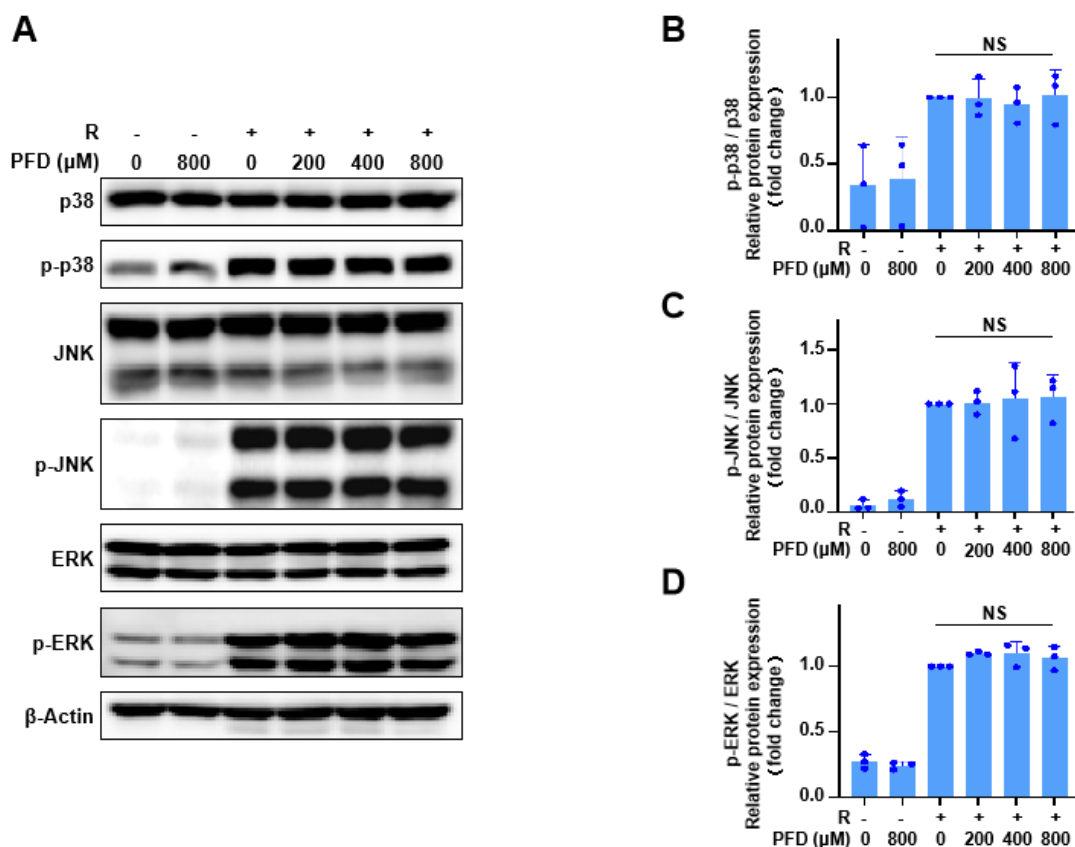

**Figure S1.** PFD has no effect on RANKL-induced MAPK pathway in BMMs. BMMs were cultured with or without PFD in GM containing M-CSF (30 ng/ml) and RANKL (100ng/ml) for 15 minutes. (A) Western blot analysis. (B–D) Quantitative densitometric analysis of (A). Pirfenidone, PFD. R, RANKL. All data represent the mean  $\pm$  SD. NS, non-significant compared with the RANKL group. n = 3.

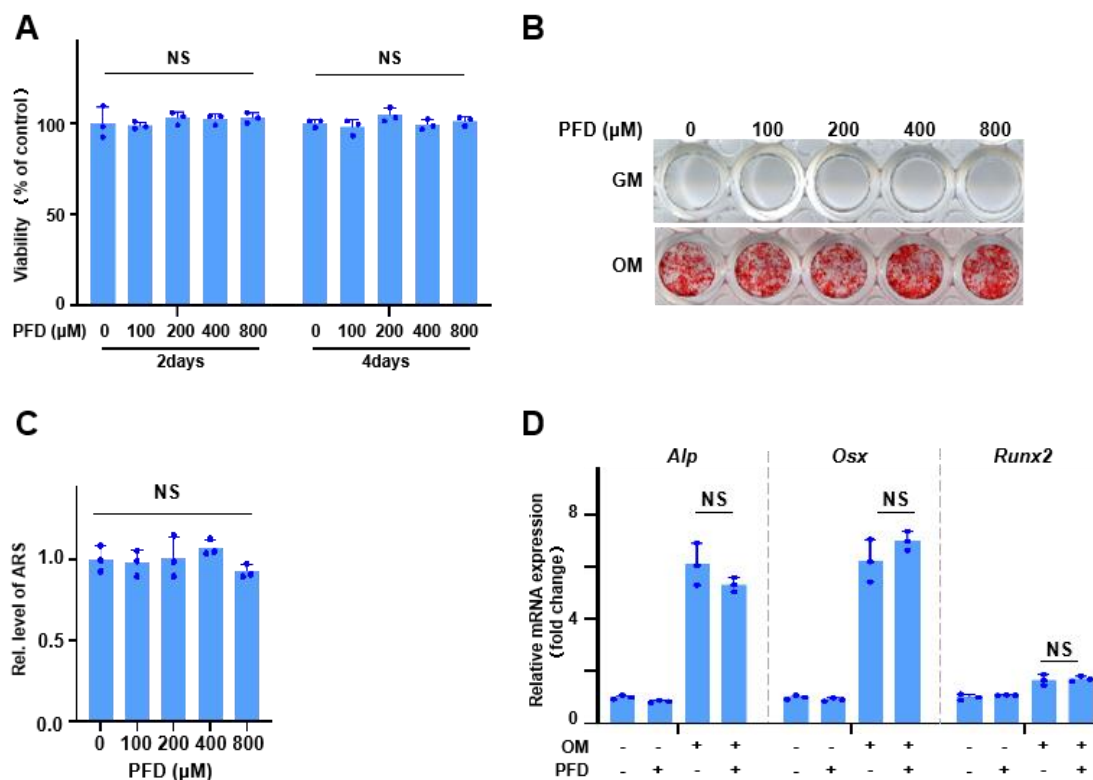

**Figure S2.** PFD has no effect on BMP2-induced osteoblast differentiation in BMSCs. (A) MTT assay. (B) Alizarin red stain (14 days). (C) The quantitative analysis of ARS staining (B). (D) Real-time PCR (10 days). Pirfenidone, PFD. GM, growth medium; OM, osteogenic medium. All data represent the mean  $\pm$  SD. NS, non-significant. n = 3.
